# Supplementary material for: Cbfβ regulates Wnt/β-catenin, Hippo/Yap, and TGFβ signaling pathways in articular cartilage homeostasis and protects from ACLT surgery-induced osteoarthritis
Source: PubMed Central journal article supplement (PMC10827176; doi:10.1101/2024.01.15.575763), 2024-01-16
Supplement: NIHPP2024.01.15.575763v1-supplement-1.pdf [file NIHPP2024.01.15.575763v1-supplement-1.pdf]

## **Cbfb regulates Wnt/ $\beta$ -catenin, Hippo/Yap, and TGF $\beta$ signaling pathways in articular cartilage homeostasis and protects from ACLT surgery-induced osteoarthritis.**

Wei Chen<sup>1, \*</sup>, Yun Lu<sup>2</sup>, Yan Zhang<sup>2</sup>, Jinjin Wu<sup>2</sup>, Abigail McVicar<sup>1</sup>, Yilin Chen<sup>1</sup>, Siyu Zhu<sup>1</sup>, Guochun Zhu<sup>2</sup>, You Lu<sup>1</sup>, Jiayang Zhang<sup>1</sup>, Matthew McConnell<sup>1</sup>, and Yi-Ping Li<sup>1, \*</sup>

### **SUPPLEMENTAL FIGURES AND FIGURE LEGENDS**

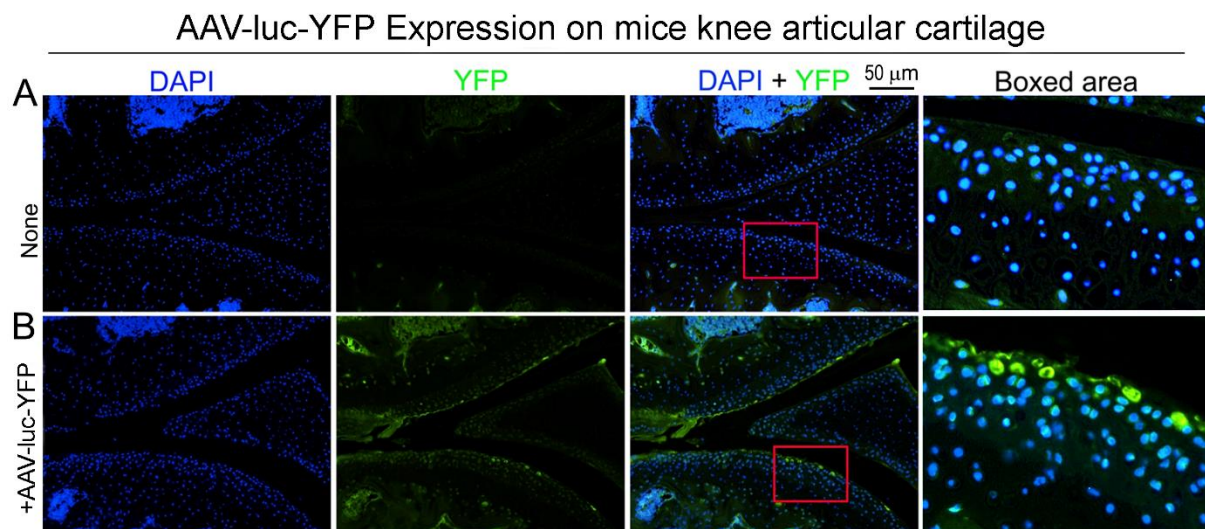

**Supplementary Figure 1. Successful AAV-luc-YFP infection in mice** Observed by fluorescence microscope. **(A)** DAPI staining for 8-weeks-old male mouse knee articular cartilage Observed by fluorescence microscope. **(B)** DAPI staining and expression for YFP in 8-weeks-old male mice knee articular cartilage Observed by fluorescence microscope. Scale bar: 50  $\mu\text{m}$  (A, B). (n=3)

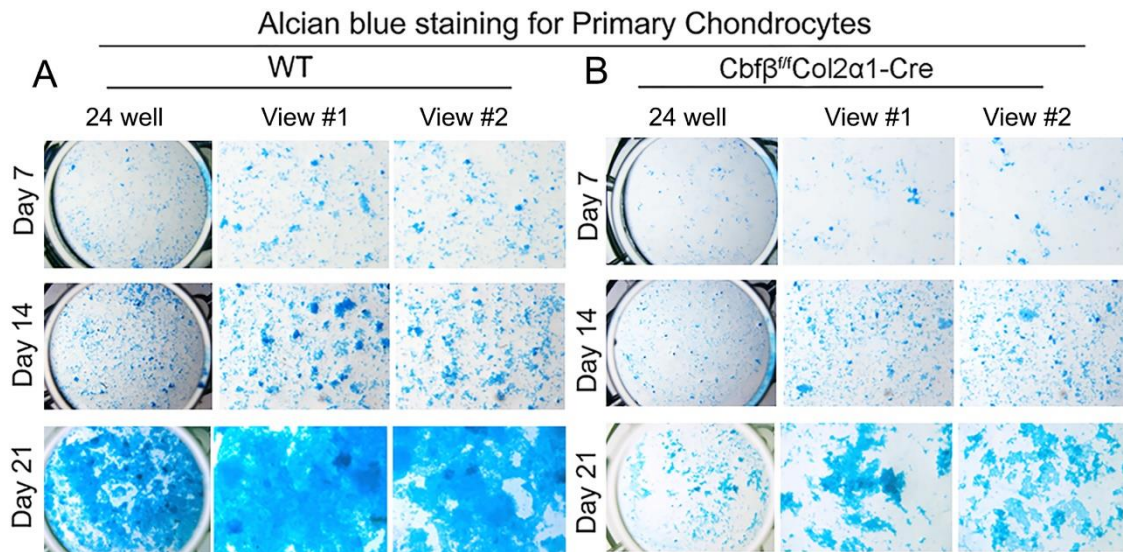

**Supplementary Figure 2. Alcian Blue staining of primary chondrocytes from *Cbfβ* deficient newborn mice show reduced matrix deposition. (A)** Alcian Blue staining of newborn WT mouse primary chondrocytes. **(B)** Alcian Blue staining of newborn (P0) *Cbfβ<sup>ff</sup>/Col2α1-Cre* mouse primary chondrocytes. (n=5)
